# Supplementary material for: How Depressing Is Inbreeding? A Meta-Analysis of 30 Years of Research on the Effects of Inbreeding in Livestock
Source: MDPI journal article supplement (doi:10.3390/genes12060926), 2021-06-18
Supplement: s1 [file s1]

**Table S5** Estimated marginal means of inbreeding depression estimates per trait, with standard errors (SEs). Inbreeding depression estimates are expressed as percentage of the trait mean ( $b_m$ ) or as percentage of the trait standard deviation ( $b_s$ ). The number of estimates (N) and the P-value for testing the mean against zero are also shown. Only traits with at least 10 records were included in the analysis.

| Trait group* Trait                            | N   | $b_m$          |  | P-value | N   | $b_s$          |  | P-value |
|-----------------------------------------------|-----|----------------|--|---------|-----|----------------|--|---------|
|                                               |     | Estimate (SE)  |  |         |     | Estimate (SE)  |  |         |
| REP/SUR Fertility interval                    | 154 | -0.271 (0.055) |  | <0.001  | 129 | -0.678 (0.255) |  | 0.008   |
| REP/SUR Fertility success                     | 93  | -0.413 (0.072) |  | <0.001  | 62  | -0.554 (0.375) |  | 0.139   |
| REP/SUR Fertility success (offspring)         | 19  | -0.465 (0.154) |  | 0.003   | -   | -              |  | -       |
| REP/SUR Fertility success (sire)              | 10  | -0.293 (0.211) |  | 0.165   | -   | -              |  | -       |
| REP/SUR Gestation length                      | 28  | 0.000 (0.108)  |  | 1.000   | 24  | 0.057 (0.459)  |  | 0.902   |
| REP/SUR Calving ease                          | 26  | 0.088 (0.124)  |  | 0.481   | 14  | 1.007 (0.595)  |  | 0.091   |
| REP/SUR Litter size                           | 26  | -0.216 (0.123) |  | 0.020   | 17  | -0.596 (0.711) |  | 0.401   |
| REP/SUR Litter size (maternal)                | 41  | -0.186 (0.104) |  | 0.075   | 20  | 0.848 (0.754)  |  | 0.261   |
| REP/SUR Litter size at later stage            | 11  | -0.512 (0.178) |  | 0.004   | -   | -              |  | -       |
| REP/SUR Litter size at later stage (maternal) | 15  | -0.576 (0.158) |  | <0.001  | -   | -              |  | -       |
| REP/SUR Adult survival                        | 11  | -0.197 (0.211) |  | 0.349   | -   | -              |  | -       |
| REP/SUR Offspring survival                    | 51  | -0.256 (0.093) |  | 0.006   | -   | -              |  | -       |
| REP/SUR Offspring survival (maternal)         | 52  | -0.153 (0.088) |  | 0.082   | 14  | 1.522 (0.588)  |  | 0.010   |
| REP/SUR Longevity                             | 21  | -0.938 (0.125) |  | <0.001  | 23  | -1.341 (0.484) |  | 0.006   |
| WEI/GRO Birth weight                          | 61  | -0.173 (0.079) |  | 0.029   | 32  | -1.024 (0.462) |  | 0.027   |
| WEI/GRO Birth weight (maternal)               | 34  | -0.034 (0.101) |  | 0.739   | 15  | -0.627 (0.603) |  | 0.299   |
| WEI/GRO Weight                                | 191 | -0.230 (0.052) |  | <0.001  | 105 | -1.179 (0.292) |  | <0.001  |
| WEI/GRO Weight (maternal)                     | 61  | -0.170 (0.081) |  | 0.035   | 36  | -0.740 (0.420) |  | 0.078   |
| WEI/GRO Growth                                | 45  | -0.196 (0.091) |  | 0.032   | 27  | -0.133 (0.460) |  | 0.773   |
| WEI/GRO Growth (maternal)                     | 17  | 0.170 (0.143)  |  | 0.234   | -   | -              |  | -       |
| CONF Body dimensions                          | 226 | -0.197 (0.062) |  | 0.004   | 212 | -0.737 (0.269) |  | 0.006   |
| CONF Body dimensions (maternal)               | 20  | -0.061 (0.143) |  | 0.669   | 12  | 0.356 (0.638)  |  | 0.577   |
| CONF Bone quality                             | 19  | -0.246 (0.134) |  | 0.067   | 18  | -0.315 (0.542) |  | 0.561   |
| CONF Conformation dairy                       | 84  | -0.117 (0.075) |  | 0.121   | 90  | -0.278 (0.315) |  | 0.378   |
| CONF Conformation other                       | 52  | -0.112 (0.088) |  | 0.203   | 52  | -0.536 (0.360) |  | 0.137   |
| CONF Scrotal circumference                    | 17  | -0.172 (0.140) |  | 0.217   | 11  | -1.200 (0.669) |  | 0.073   |
| PROD Milk yield                               | 69  | -0.547 (0.081) |  | <0.001  | 52  | -1.587 (0.377) |  | <0.001  |
| PROD Fat yield                                | 39  | -0.507 (0.100) |  | <0.001  | 32  | -1.903 (0.435) |  | <0.001  |
| PROD Protein yield                            | 37  | -0.452 (0.103) |  | <0.001  | 30  | -1.938 (0.446) |  | <0.001  |
| PROD Fat%                                     | 21  | -0.099 (0.130) |  | 0.448   | 18  | 0.239 (0.553)  |  | 0.665   |
| PROD Protein%                                 | 20  | -0.070 (0.134) |  | 0.602   | 17  | 1.057 (0.570)  |  | 0.064   |
| PROD Milk other                               | 12  | -0.155 (0.163) |  | 0.340   | -   | -              |  | -       |
| PROD Egg number                               | 17  | -0.447 (0.192) |  | 0.020   | 10  | -1.889 (1.593) |  | 0.236   |
| PROD Egg weight                               | 16  | -0.290 (0.167) |  | 0.083   | -   | -              |  | -       |
| PROD Carcass/meat quality                     | 21  | -0.054 (0.128) |  | 0.675   | 13  | 0.384 (0.636)  |  | 0.546   |
| PROD Fleece production                        | 10  | -0.251 (0.211) |  | 0.235   | -   | -              |  | -       |
| PROD Litter weight (maternal)                 | 11  | -0.203 (0.184) |  | 0.271   | -   | -              |  | -       |
| PROD Litter weight at weaning                 | 10  | -0.878 (0.183) |  | <0.001  | -   | -              |  | -       |
| PROD Litter weight at weaning (maternal)      | 11  | 0.144 (0.172)  |  | 0.403   | -   | -              |  | -       |
| PROD Production other                         | 12  | -0.803 (0.422) |  | 0.422   | -   | -              |  | -       |
| HEA SCS                                       | 22  | -0.609 (0.129) |  | <0.001  | 21  | -0.501 (0.522) |  | 0.337   |
| OTH Behavior                                  | 14  | -0.005 (0.150) |  | 0.972   | 13  | 0.412 (0.614)  |  | 0.503   |
| OTH Horse competition performance             | -   | -              |  | -       | 10  | -0.602 (0.848) |  | 0.478   |

\*REP/SUR: reproduction/survival, WEI/GRO: weight/growth, CONF: conformation, PROD: production, HEA: health, OTH: other
