# Supplementary material for: How Depressing Is Inbreeding? A Meta-Analysis of 30 Years of Research on the Effects of Inbreeding in Livestock
Source: MDPI journal article supplement (doi:10.3390/genes12060926), 2021-06-18
Supplement: s1 [file s1]

**Table S3** Pairwise comparisons of estimated marginal means (EMMs) of  $b_m$  between trait groups\*. The EMM for each trait group is shown (on diagonal), as well as the difference between two EMMs (below diagonal) and Tukey's adjusted P-value (above diagonal). Significant differences ( $P < 0.05$ ) are shown in bold.

|         | REP/SUR       | WEI/GRO       | CONF         | PROD          | HEA    | OTH          |
|---------|---------------|---------------|--------------|---------------|--------|--------------|
| REP/SUR | -0.302        | 0.673         | <b>0.010</b> | 1.000         | 1.000  | <b>0.001</b> |
| WEI/GRO | -0.075        | -0.227        | 0.742        | 0.724         | 0.999  | <b>0.013</b> |
| CONF    | <b>-0.160</b> | -0.085        | -0.142       | <b>0.029</b>  | 0.821  | 0.103        |
| PROD    | 0.006         | 0.080         | <b>0.166</b> | -0.308        | 0.999  | <b>0.001</b> |
| HEA     | -0.034        | 0.041         | 0.126        | -0.040        | -0.268 | 0.053        |
| OTH     | <b>-0.431</b> | <b>-0.356</b> | -0.271       | <b>-0.436</b> | -0.397 | 0.129        |

\*REP/SUR: reproduction/survival, WEI/GRO: weight/growth, CONF: conformation, PROD: production, HEA: health, OTH: other
