# Supplementary material for: How Depressing Is Inbreeding? A Meta-Analysis of 30 Years of Research on the Effects of Inbreeding in Livestock
Source: MDPI journal article supplement (doi:10.3390/genes12060926), 2021-06-18
Supplement: s1 [file s1]

**Table S4** Pairwise comparisons of estimated marginal means (EMMs) of  $b_s$  between trait groups\*. The EMM for each trait group is shown (on diagonal), as well as the difference between two EMMs (below diagonal) and Tukey's adjusted P-value (above diagonal). Significant differences ( $P < 0.05$ ) are shown in bold.

|         | REP/SUR | WEI/GRO       | CONF   | PROD          | HEA    | OTH          |
|---------|---------|---------------|--------|---------------|--------|--------------|
| REP/SUR | -0.410  | 0.311         | 0.999  | 0.735         | 0.919  | 0.117        |
| WEI/GRO | 0.661   | -1.071        | 0.535  | 0.943         | 1.000  | <b>0.004</b> |
| CONF    | 0.077   | -0.584        | -0.487 | 0.908         | 0.957  | 0.064        |
| PROD    | 0.343   | -0.318        | 0.266  | -0.753        | 1.000  | <b>0.021</b> |
| HEA     | 0.481   | -0.180        | 0.404  | 0.138         | -0.891 | 0.086        |
| OTH     | -1.236  | <b>-1.897</b> | -1.313 | <b>-1.579</b> | -1.717 | 0.826        |

\*REP/SUR: reproduction/survival, WEI/GRO: weight/growth, CONF: conformation, PROD: production, HEA: health, OTH: other
